# Supplementary material for: The influence of laser intensity activated plasmonic gold nanoparticle-generated photothermal effects on cellular morphology and viability: a real-time, long-term tracking and monitoring system
Source: Royal Society of Chemistry journal article supplement (doi:10.1039/c9pp00054b), 2019-04-04
Supplement: c9pp00054b7.pdf [file c9pp00054b7.pdf]

Supporting Information 1. Video file. The process of AuNR uptake by MG-63 cells.

Supporting Information 2. Video file. The photothermal effects on cell morphology with AuNR treatment after 10 min of laser exposure at 9 W/cm<sup>2</sup>.

Supporting Information 3. Video file. The photothermal effects on cell morphology with AuNR treatment after 30 min of laser exposure at 9 W/cm<sup>2</sup>.

Supporting Information 4. Video file. The process of photothermal effects on cell morphology in non-treated AuNR cells after 30 min of laser exposure at 32 W/cm<sup>2</sup>.

Supporting Information 5. Video file. AuNR-treated cells were exposed to the laser at 9 W/cm<sup>2</sup> for 10 min followed by cyclic irradiation at 0.3 W/cm<sup>2</sup> for 3 h and rest for 3 h.

Scale bar: 10 μm.

Supporting Information 6. Video file. AuNR-treated cells were exposed to the laser at 5 W/cm<sup>2</sup> for 20 min followed by cyclic irradiation at 0.3 W/cm<sup>2</sup> for 3 h and rest for 3 h.

Scale bar: 10 μm.
